# Supplementary material for: Evolution of biogeochemical Properties Inside Poleward Undercurrent Eddies in the Southeast Pacific Ocean
Source: Copernicus journal article supplement (doi:10.5194/egusphere-2024-1290), 2024-06-05
Supplement: Supplementary file 3 [file egusphere-2024-1290-supplement.zip]

## Supplementary Figures

**Figure S1.** Mean state of various properties at the first ~100 km from the slope. The typical characteristics were obtained by averaging areas of  $1^\circ \times 1^\circ$  along the coast between the isopycnal layers  $S_{\text{upper}}$  and  $S_{\text{lower}}$  over 9 years (See Methods 2.2). (a) absolute salinity, (b)  $O_2$ , (c)  $N_2O$ , (d)  $NH_4^+$ , (e)  $NO_2^-$ , (f)  $NO_3^-$ .

**Figure S2.** Distribution of water masses and mean state of biogeochemical characteristics within the  $S_{\text{core}}$  layer. (a) Average conservative temperature and absolute salinity diagram. The water masses in the study area and their typical values are shown according to Silva et al. (2019) (black squares): Subtropical Water (STW;  $20^\circ\text{C}$ , 35.2), Subantarctic Water (SAAW;  $11.5^\circ\text{C}$ , 33.8), Equatorial Subsurface Water (ESSW;  $12.5^\circ\text{C}$ , 34.9), and Antarctic Intermediate Water (AAIW;  $3^\circ\text{C}$ , 34). Black contours represent potential density anomalies (the  $S_{\text{core}}$  is the red line). Relations between AOU and (b) absolute salinity, (c)  $\Delta NO_3^-$ , and (d)  $\Delta N_2O$ . Colors specify the subregions that were defined in Figure 1b.

**Figure S3.** Relationship between the  $NH_4^+$  and  $O_2$  concentrations at the  $S_{\text{core}}$  layer for all identified Puddies. Color dots corresponding to the mean property at the core of the Puddy (section 2.5) are contrasted with the corresponding mean state (color squares, section 2.3). The colors used to specify regions are the same as in Figure 1b. Vertical error bars show the y-axis standard deviation, whereas the horizontal error bars represent the standard deviation of  $O_2$ .

**Figure S4.** Mean vertical variance ( $\sigma^2$ ), and skewness ( $\sigma^3$ ) associated with the terms involved in the  $O_2$  budget within Puddies at the first ~100 km from the slope. (a) XADV, (b) YADV, (c) VADV, (d) HMIX, (e) VMIX, (f) PHYS. Details of the terms are similar to Figure 5. The variance (red line) and skewness (blue line) were calculated for each profile following the same method as used in Figure 2 and averaging along the coast.

**Figure S5.** Relative vorticity,  $NO_3^-$ ,  $NO_2^-$  and  $N_2O$  related to the suboxic (SP) and hypoxic Puddies (HP). (a-d) SP was located at  $75.5^\circ\text{W}$ ,  $25.18^\circ\text{S}$  with a lifespan of ~11.5 weeks, (e-h) HP was located at  $76.5^\circ\text{W}$ ,  $35.8^\circ\text{S}$  with a lifespan of ~21 weeks. Black contours show the isopycnal layers  $S_{\text{upper}}$ ,  $S_{\text{core}}$  and  $S_{\text{lower}}$ . The edge of the Puddies is represented by the dotted line (black) with a radii of 83 km (SP) and 73 km (HP). (a,e) Zonal component velocity (white lines) indicates westward flow (dashed line) and eastward flow (solid line). The core

with low  $O_2$  (magenta lines) encloses hypoxia (solid line), suboxia, and anoxia associated with  $O_2 < 1 \mu M$  (dashed line). White contours enclose  $O_2$  concentrations of 90 and 120  $\mu M$ .

**Figure S6.** Evolution of the  $O_2$  minimum inside the suboxic and hypoxic Puddies during their lifespan.
