# Supplementary figures and images for: Evolution of biogeochemical Properties Inside Poleward Undercurrent Eddies in the Southeast Pacific Ocean
Source: Copernicus journal article supplement (doi:10.5194/egusphere-2024-1290), 2024-06-05

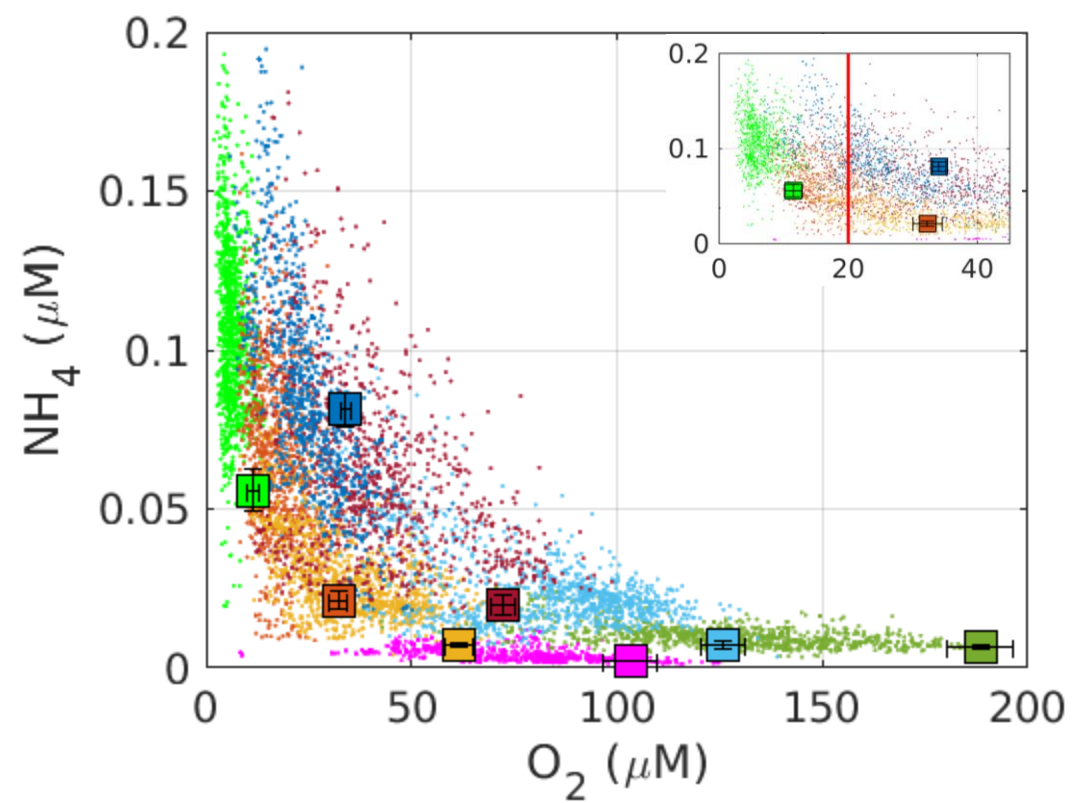

Supplement: Supplementary file 1 [file egusphere-2024-1290-supplement.zip]

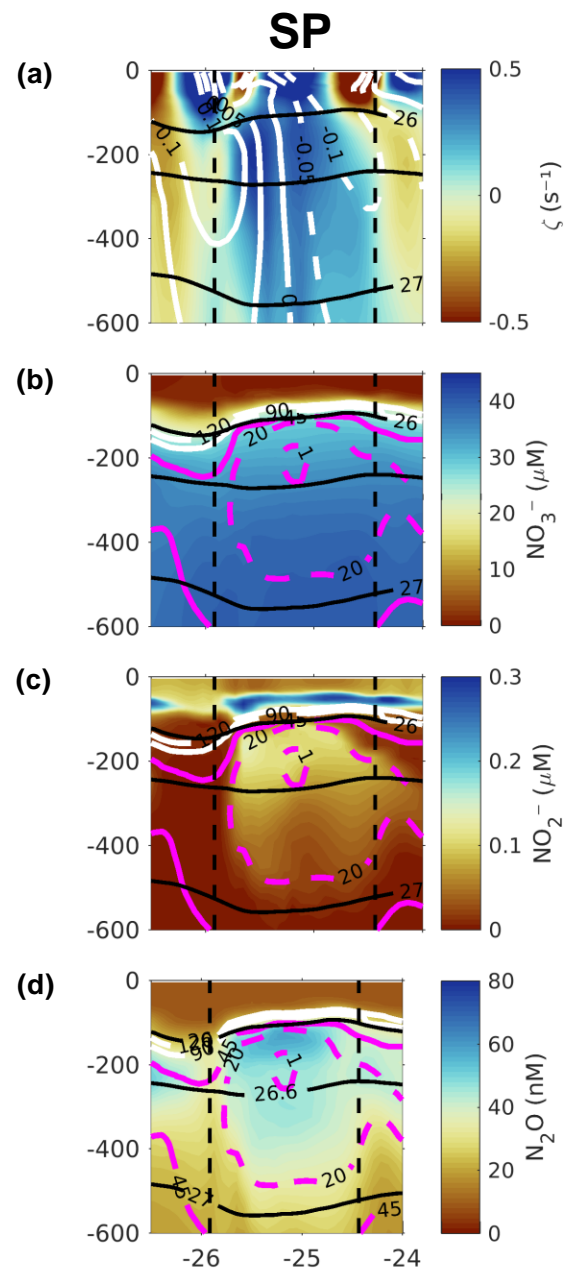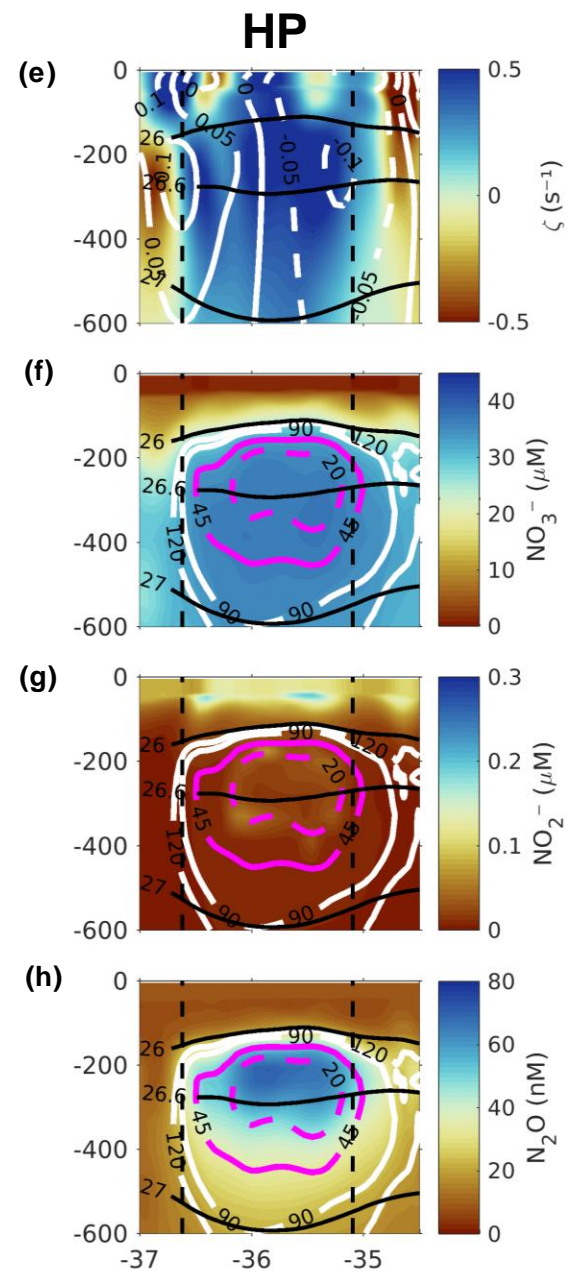

Supplement: Supplementary file 2 [file egusphere-2024-1290-supplement.zip]

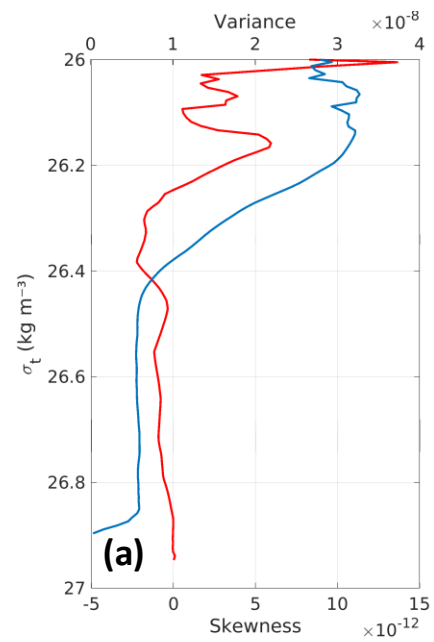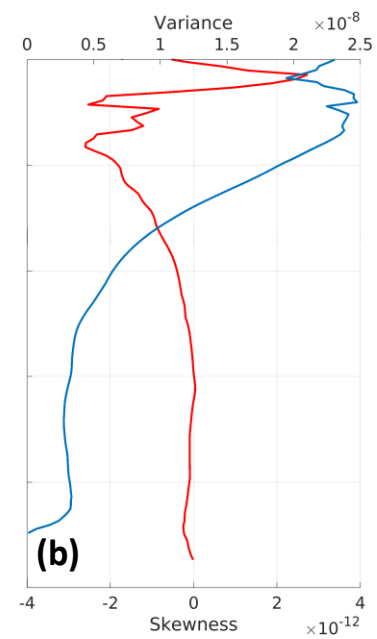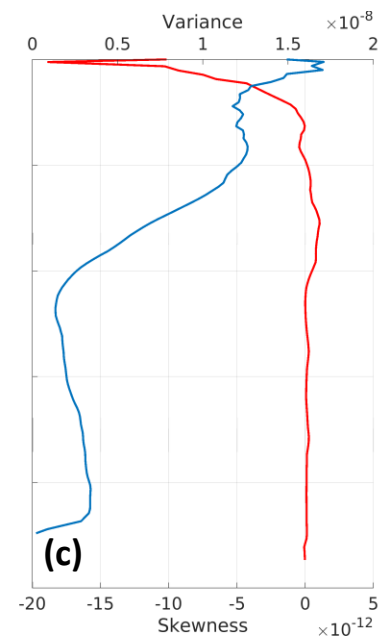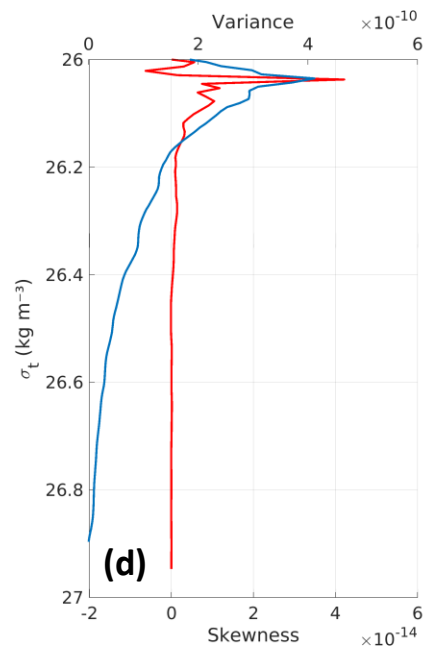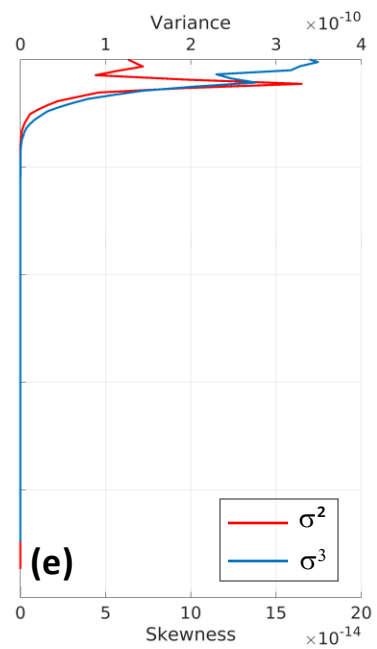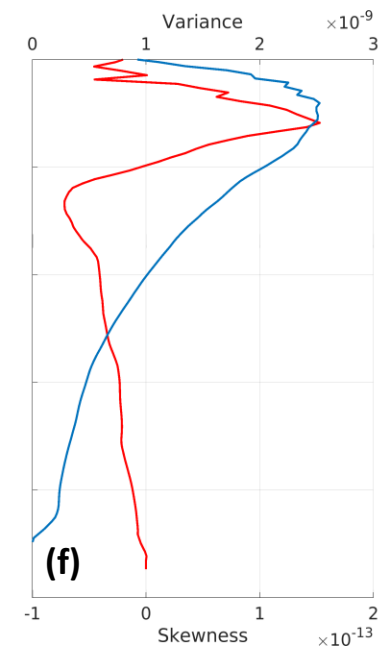

Supplement: Supplementary file 4 [file egusphere-2024-1290-supplement.zip]

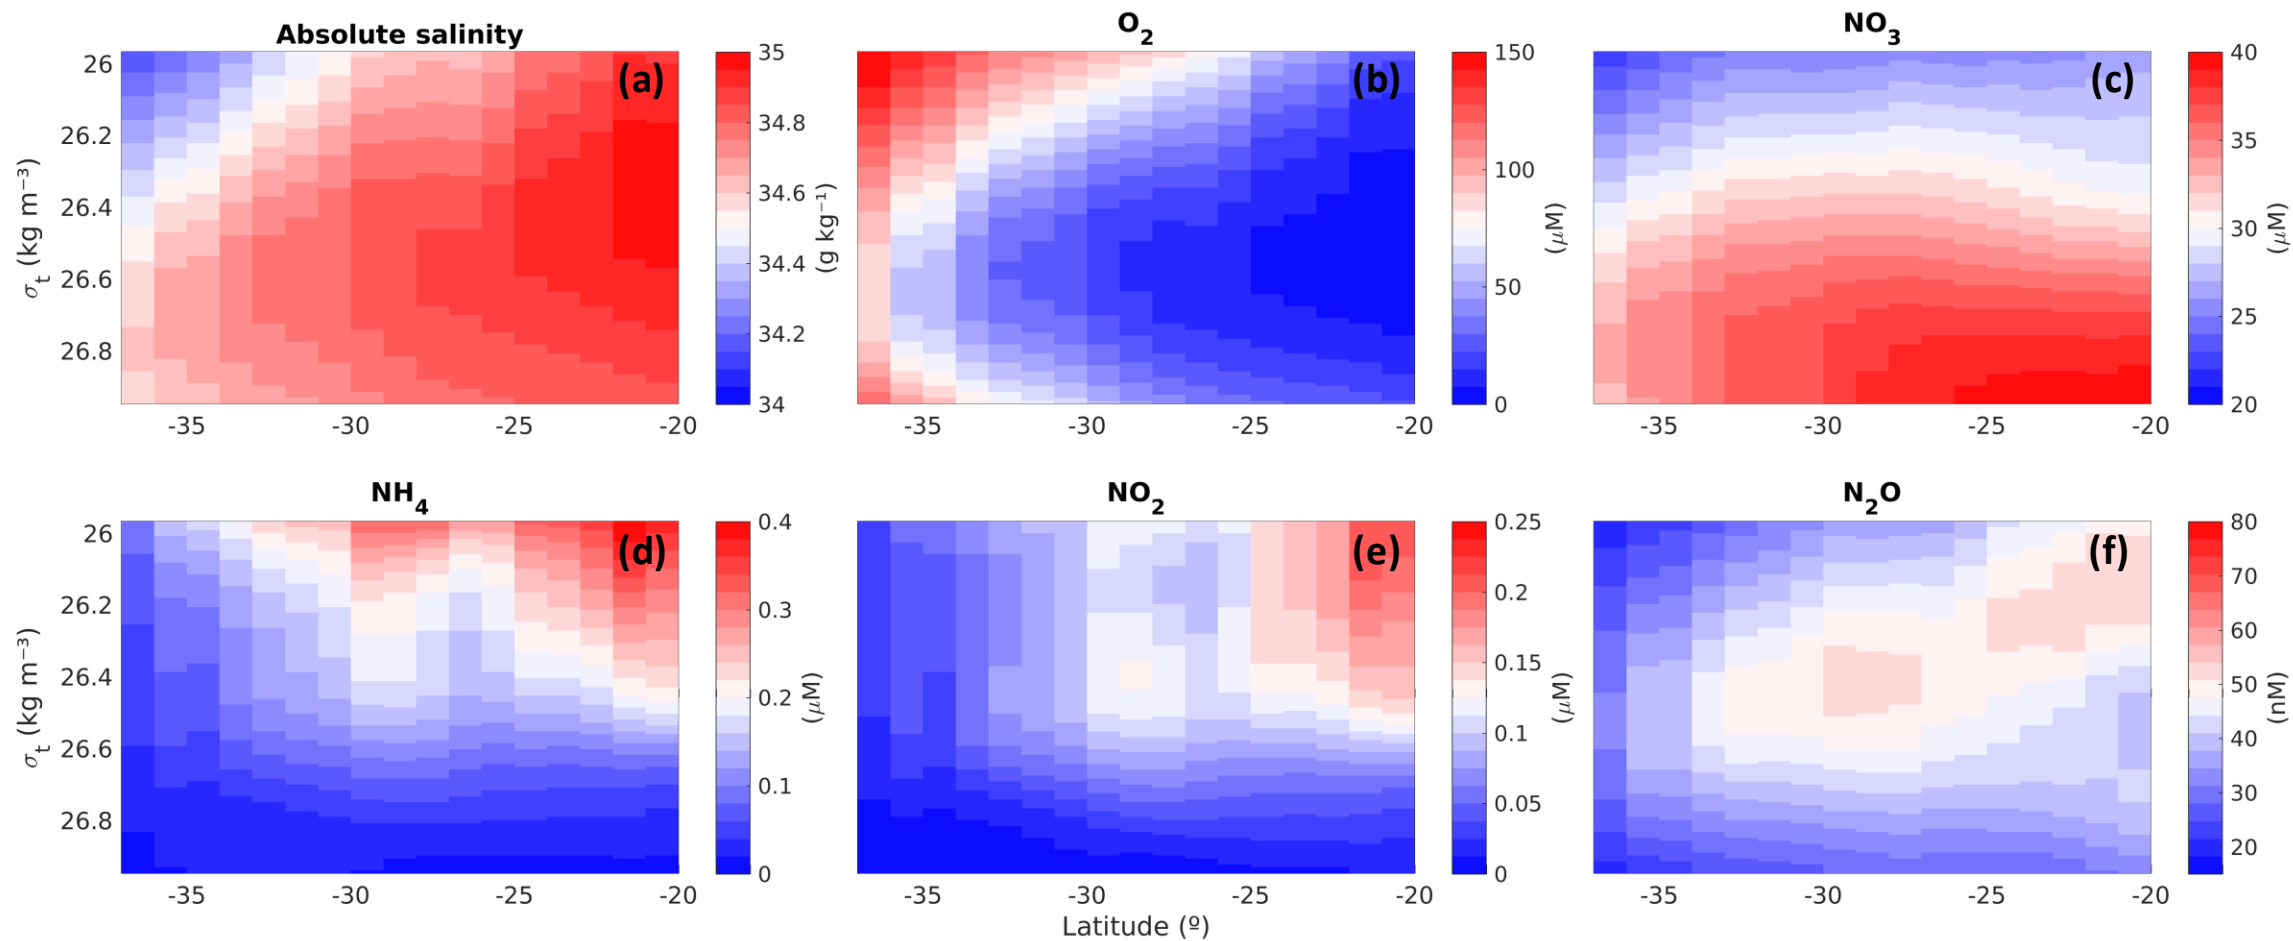

Supplement: Supplementary file 5 [file egusphere-2024-1290-supplement.zip]

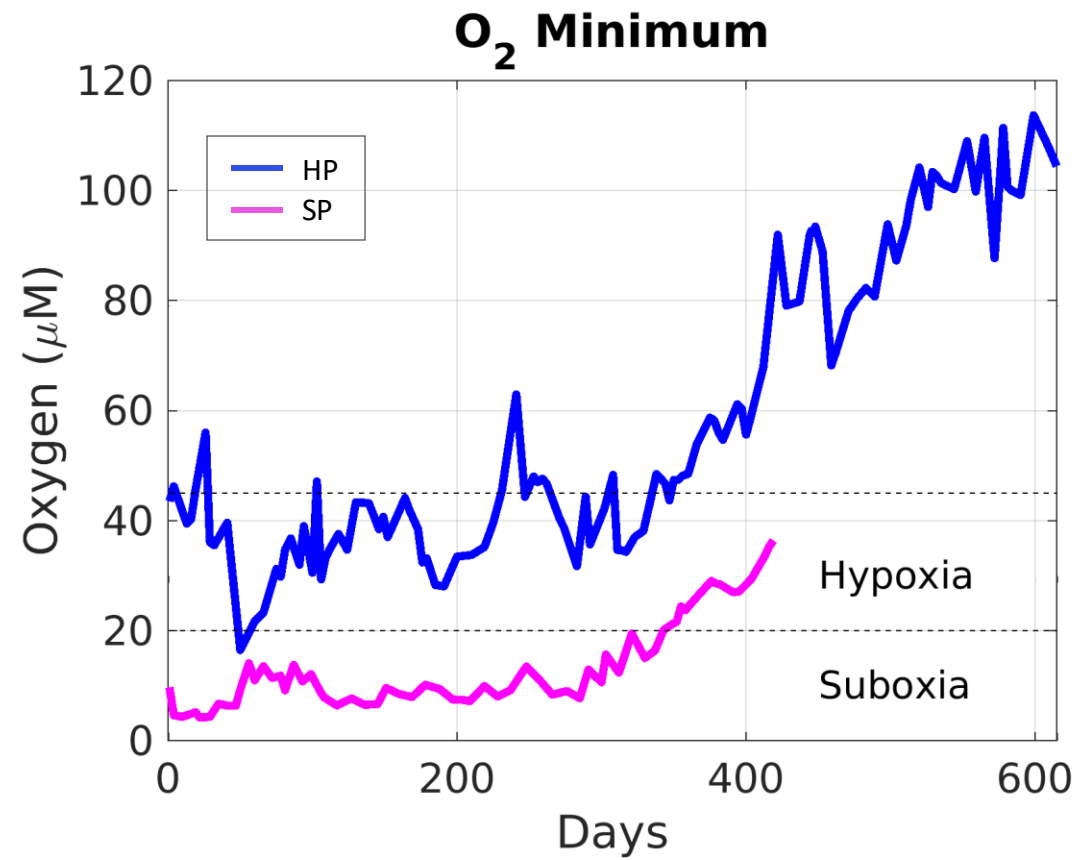

Supplement: Supplementary file 6 [file egusphere-2024-1290-supplement.zip]

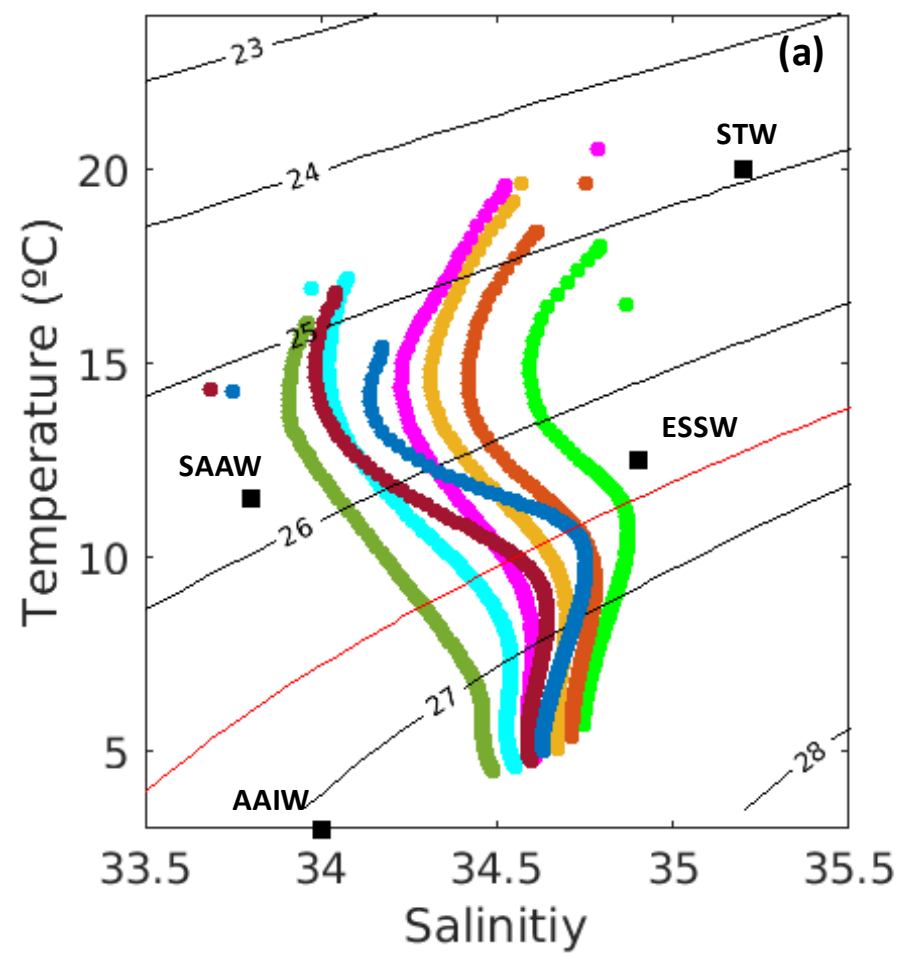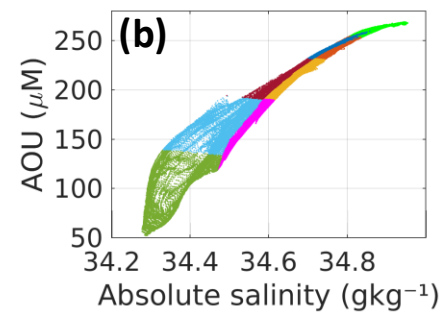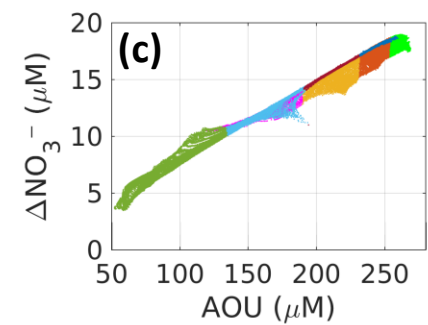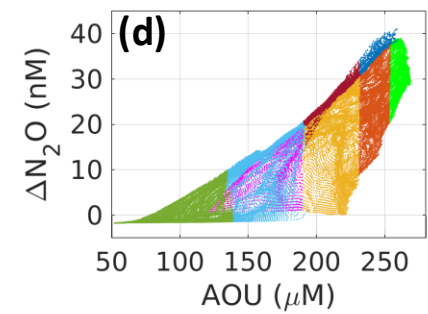

Supplement: Supplementary file 7 [file egusphere-2024-1290-supplement.zip]
